# Supplementary material for: Survival, causes of death, and cardiovascular events in patients with Marfan syndrome
Source: PubMed Central journal article supplement (PMC6305663; doi:10.1002/mgg3.489), 2018-11-04
Supplement: MGG3-6-1114-s001.pdf [file MGG3-6-1114-s001.pdf]

## Supplementary table

### Mutations in *FBN1* (\*134797) in 58 MFS subjects

| Nucleotide change   | Interpretation       |
|---------------------|----------------------|
| c.266G>A            | p.Cys89Tyr           |
| c.618delA           | p.Lys207fs           |
| c.629G>A            | p.Cys210Tyr          |
| c.1090C>T           | p.Arg364X            |
| c.1585C>T           | p.Arg529X            |
| c.2170A>G           | p.Ile724Val          |
| c.2305T>A           | p.Cys769Ser          |
| c.2308delG          | p.Val770frX          |
| c.2447G>T           | p.Cys816Phe          |
| c.2848T>C           | p.Cys950Arg          |
| c.3083-2A>G         | Splice site mutation |
| c.3338A>G           | p.Asp1113Gly         |
| c.4087G>A           | p.Asp1363Asn         |
| c.4211-1G>A         | Splice site mutation |
| c.4269_4270delAC    | p.Ala1423fs          |
| c.4348T>G           | p.Cys1450Gly         |
| c.4588C>T           | p.Arg1530Cys         |
| c.4620_4621dupGACCT | p.Arg1541fs          |
| c.4925A>G           | p.Asp1642Gly         |
| c.5296G>C           | p.Asp1766His         |
| c.5559del(T)        | p.Cys1853fs          |
| c.5866T>C           | p.Cys1956Arg         |
| c.6388G>A           | p.Glu2130Lys         |
| c.6508T>A           | p.Cys2170Ser         |
| c.7094G>A           | p.Cys2365Tyr         |
| c.7168T>A           | p.Cys2390Gly         |
| c.7421G>A           | p.Tyr2474Cys         |
| c.7816_7817delGT    | p.Val2606fs          |
| c.7886A>G           | p.Tyr2629Cys         |
| c.8422C>T           | p.Gln2808X           |
| c.247+1G>A          | Splice site mutation |
| c.4816+3delAATTGT   | Splice site mutation |
| c.4942+2T>C         | Splice site mutation |
| c.5788+5G>A         | Splice site mutation |
| Del exon 1-6        | Large deletion       |
| Del exon 3          | Large deletion       |
| Del exon 63-65      | Large deletion       |
